# Supplementary material for: Formulation of Genetic Counseling Format for Adult Bangladeshi Patients with Acute Myeloid Leukemia
Source: Hindawi journal article supplement (doi:10.1155/2018/1534090), 2018-04-29
Supplement: f1 [file 1534090.f1.pdf]

# Genetic Counseling Format for Adult Bangladeshi AML Patients

Please use remark or tick mark (✓) if necessary

| A. General Information                                     |                                                                                                                                                                           |
|------------------------------------------------------------|---------------------------------------------------------------------------------------------------------------------------------------------------------------------------|
| 1. ID No.                                                  | :                                                                                                                                                                         |
| 2. Patient Name                                            | :                                                                                                                                                                         |
| 3. Age in year                                             | :                                                                                                                                                                         |
| 4. Sex                                                     | : <input type="checkbox"/> Male <input type="checkbox"/> Female <input type="checkbox"/> Other                                                                            |
| 5. Marital status                                          | : <input type="checkbox"/> Single <input type="checkbox"/> Married <input type="checkbox"/> Divorced <input type="checkbox"/> Widowed <input type="checkbox"/> Separated  |
| 6. Number of children                                      | : _____ boy(s) _____ girl(s)                                                                                                                                              |
| 7. Educational status                                      | :                                                                                                                                                                         |
| 8. Occupation                                              | :                                                                                                                                                                         |
| 9. Address                                                 | :                                                                                                                                                                         |
| Permanent                                                  | :                                                                                                                                                                         |
| Present                                                    | :                                                                                                                                                                         |
| Cell phone                                                 | :                                                                                                                                                                         |
| E-mail                                                     | :                                                                                                                                                                         |
| 10. Please mention who referred you for genetic counseling | : <input type="checkbox"/> Physician <input type="checkbox"/> Patient <input type="checkbox"/> Family member <input type="checkbox"/> Self <input type="checkbox"/> Other |

| B. Personal Information                       |                                                                                                                                                        |
|-----------------------------------------------|--------------------------------------------------------------------------------------------------------------------------------------------------------|
| 1. Birth history                              | : Full term- <input type="checkbox"/> Yes <input type="checkbox"/> No<br>Delivery- <input type="checkbox"/> Vaginal <input type="checkbox"/> C-section |
| 2. Consanguinity of marriage                  | : <input type="checkbox"/> Yes <input type="checkbox"/> No                                                                                             |
| 3. Female patient                             |                                                                                                                                                        |
| i) Do you have menstrual periods?             | : <input type="checkbox"/> Yes <input type="checkbox"/> No                                                                                             |
| If yes, then your periods                     | : <input type="checkbox"/> Regular <input type="checkbox"/> Irregular <input type="checkbox"/> Painful                                                 |
| Age at start of menstrual period              | :                                                                                                                                                      |
| How often do they occur?                      | : Every _____ days                                                                                                                                     |
| How long do they last?                        | : _____ days                                                                                                                                           |
| If no, when it stop?                          | :                                                                                                                                                      |
| After that if any Vaginal bleeding, discharge | :                                                                                                                                                      |
| ii) Have you ever been pregnant?              | : <input type="checkbox"/> Yes <input type="checkbox"/> No                                                                                             |
|                                               | if yes, then fill the following-                                                                                                                       |
|                                               | Total number of pregnancies _____                                                                                                                      |
|                                               | Total number of miscarriages/ abortions _____                                                                                                          |
|                                               | Total number of living children _____                                                                                                                  |
| 4. History of substance use                   |                                                                                                                                                        |
| i) Did you use ever tobacco?                  | : <input type="checkbox"/> Yes <input type="checkbox"/> No                                                                                             |
|                                               | If yes, then                                                                                                                                           |
|                                               | <input type="checkbox"/> Cigarette <input type="checkbox"/> Chew <input type="checkbox"/> Snuff                                                        |
|                                               | If current smoker, then _____ per day                                                                                                                  |
| ii) Do you drink alcohol?                     | : <input type="checkbox"/> Yes <input type="checkbox"/> No                                                                                             |
|                                               | If yes, then mention detail _____                                                                                                                      |
| iii) Have you ever shared needles?            | : <input type="checkbox"/> Yes <input type="checkbox"/> No                                                                                             |
|                                               | If yes, then mention detail (medication/addiction purpose)                                                                                             |

### C. Medical History

1. When have your disease first diagnosed? : \_\_\_\_\_ age in year
2. Which of the following symptoms before diagnosis of the present disease you were going to the doctor : ☐ Fever ☐ Weakness ☐ Headache ☐ Night sweats ☐ Shortness of breath  
☐ Loss of appetite ☐ Swelling in the abdomen ☐ Bleeding gum  
☐ Weight loss ☐ Frequent nose bleeding ☐ Excess bruising ☐ Bone/joint pain
3. Before diagnosis of AML, have you taken doctor advice for any other blood disease? : ☐ Yes ☐ No
4. Do you any birth disease (congenital) diagnosed previously? : ☐ Yes ☐ No
5. Have you had any other cancer? : ☐ Yes ☐ No
6. When you were born, how old was your father and mother? :
7. Do you have any big brother or sister? : ☐ Yes ☐ No  
If yes, then how much age difference from your immediate big brother/sister?
8. Did you ever take chemotherapy/radiotherapy for treatment purpose? : ☐ Yes ☐ No
9. Did you frequently encounter industrial or medical science radiation (X-ray, CT scan)? : ☐ Yes ☐ No

### D. Environmental Factor Exposure History

1. Have you ever exposed to over/unusual smoke in your life? : ☐ Yes ☐ No  
If yes, then  
☐ Motor vehicle ☐ Industrial ☐ Formalin ☐ Insecticide ☐ Others
2. Have you ever worked in the industries/factories? : ☐ Yes ☐ No  
If yes, then  
☐ Cement factory ☐ Coal mine ☐ Fertilizer factory ☐ Petroleum refining  
☐ Paint factory ☐ Paper factory ☐ Rubber factory ☐ Shoe factory  
☐ Others

### E. Family History

Take 3 generations of the family history to draw the pedigree to identify the inheritance patterns

*Pedigree chart [ Follow the instruction]*

|                     |
|---------------------|
| Family Origin _____ |
| I                   |
| II                  |
| III                 |

### F. Laboratory investigation

|                                     |   |
|-------------------------------------|---|
| Blood examination finding           | : |
| Bone marrow examination finding     | : |
| CSF marrow examination finding      | : |
| Immunophenotype examination finding | : |
| Genomic examination finding         | : |
| Karyotype                           | : |
| FISH                                | : |
| PCR                                 | : |
| Molecular analyses                  | : |

### G. Summary of the case

### H. Comments of the genetic counselor

Types of AML : ☐ Sporadic ☐ Familial ☐ Hereditary

Inheritance pattern : ☐ Autosomal Dominant/ Recessive  
☐ X-linked Dominant/ Recessive  
☐ Mitochondrial

Genetic test: : ☐ Done ☐ Desire to be done ☐ Not desire to be done

Name of Genetic counselor with Seal

Address of Genetic counselor

Place of Genetic counseling

### Card for Consultand

**Institution name:** \_\_\_\_\_

Name of Consultand: \_\_\_\_\_ Age in Year \_\_\_\_\_

**Types of AML:**

- ☐ Sporadic  
☐ Familial  
☐ Hereditary

**Inheritance pattern:**

- ☐ Autosomal Dominant/ Recessive  
☐ X-linked Dominant/ Recessive  
☐ Mitochondrial

**Genetic test:** ☐ Done ☐ Desire to be done ☐ Not desire to be done

Suggested genetic Test: \_\_\_\_\_

Follow up (provable date and time):

Genetic counseling Summary: \_\_\_\_\_
